# Supplementary material for: Assessing the response of groundwater quantity and travel timedistribution to 1.5, 2 and 3 degrees global warming in a mesoscalecentral German basin
Source: Copernicus journal article supplement (doi:10.5194/hess-2019-9), 2019-01-16
Supplement: Supplementary file [file hess-2019-9-AC2-supplement.pdf]

# Assessing the response of groundwater quantity and travel time distribution to 1.5, 2 and 3 degrees global warming in a mesoscale central German basin

Miao Jing<sup>1,2</sup>, Rohini Kumar<sup>1</sup>, Falk Heße<sup>1</sup>, Stephan Thober<sup>1</sup>, Oldrich Rakovec<sup>1,3</sup>, Luis Samaniego<sup>1</sup>, and Sabine Attinger<sup>1,4</sup>

<sup>1</sup>Department of Computational Hydrosystems, UFZ – Helmholtz Centre for Environmental Research, Permoserstr. 15, 04318 Leipzig, Germany

<sup>2</sup>Institute of Geosciences, Friedrich Schiller University Jena, Burgweg 11, 07749 Jena, Germany

<sup>3</sup>Czech University of Life Sciences, Faculty of Environmental Sciences, Prague, 169 00, Czech Republic

<sup>4</sup>Institute of Earth and Environmental Sciences, University of Potsdam, Karl-Liebknecht-Str. 24–25, 14476 Potsdam, Germany

**Correspondence:** Miao Jing (miao.jing@ufz.de); Falk Heße (falk.hesse@ufz.de)

**Abstract.** Groundwater is the biggest single source of high-quality fresh water worldwide, which is also continuously threatened by the changing climate. This paper is designed to investigate the response of regional groundwater system to the climate change under three global warming levels (1.5, 2, and 3 °C) in a central German basin (Nägelstedt). This investigation is conducted by deploying an integrated modeling workflow that consists of a mesoscale Hydrologic Model (mHM) and a fully-distributed groundwater model OpenGeoSys (OGS). mHM is forced by five general circulation models under three representative concentration pathways. The diffuse recharges estimated by mHM are used as outer forcings of the OGS groundwater model to compute changes in groundwater levels and travel time distributions. Simulation results ~~indicate~~ indicates that under future climate scenarios, groundwater recharges and levels are expected to increase slightly. Meanwhile, the mean travel time is expected to decrease compared to the historical average. However, the ensemble simulations do not all agree on the sign of relative change. The ensemble simulations do not show a systematic relationship between the projected change and the warming level, but they indicate an increased variability in projected changes with the enhanced warming level from 1.5 to 3 °C. ~~This study indicates that a~~ The predictive uncertainties related to climate projections are more pronounced than that related to hydraulic conductivity fields. Our results imply that higher warming level may introduce more uncertain and extreme events for the studied regional groundwater system. Correspondingly, it is highly recommended to restrain the trend of global warming.

## 15 1 Introduction

The availability, sustainability, and quality of water resources are threatened by many sources, among which the changing climate plays a critical part (Stocker, 2014). A significant sign of climate change is the global warming, which has been evidenced by the analysis of long-term air temperature records. Not only the earth surface temperature shows a constant warming trend, the sea surface temperature has also increased (Stocker, 2014). There has been adequate proofs that the massive

greenhouse gas emissions since the eighteenth century accelerate the global warming process (Stocker, 2014). Consequently, it is urgently needed to estimate the change of meteorological variables (e.g., precipitation and temperature) in the future global warming scenarios. General circulation models (GCMs) combined with different emission scenarios or representative concentration pathways (RCPs) have been widely employed for climate impact study (Collins et al., 2013; Thober et al., 2018; Marx et al., 2018).

Climate change may significantly alter the pattern of terrestrial hydrological processes, influence the spatial and temporal behavior of shallow water storages, and manipulate the degree and frequency of extreme events such as floods and droughts (Van Roosmalen et al., 2009; Sridhar et al., 2017; Thober et al., 2018; Marx et al., 2018). Hydrological processes and states (e.g., evapotranspiration, soil moisture, and potential recharge) are tightly coupled with current climate and meteorological variables (e.g., precipitation, humidity, atmosphere temperature). The impact of climate change on the terrestrial water cycle is, unfortunately, uncertain. Climate model projections show a good consistency in future global averaged trends, but may disagree on the magnitude of regional-scale variables, particularly when precipitation projection is involved in (Meehl et al., 2007). Many past studies devote to estimate the control and uncertainty of climate change on hydrological states and fluxes (Hunt et al., 2013; Samaniego et al., 2018; Renée Brooks et al., 2010; Hattermann et al., 2017; Goderniaux et al., 2009). Among them, some studies indicate that the frequency and intensity of extreme events (e.g., soil moisture drought, heat wave) may be exacerbated owing to anthropogenic warming (Samaniego et al., 2018; Kang and Eltahir, 2018; Marx et al., 2018). The global water scarcity is likely to be exacerbated due to the potential decline in fresh water resources under the 2 °C global warming scenario (Schewe et al., 2014).

As the single biggest source of world's fresh water supply, groundwater plays a critical role in the sustainability of terrestrial ecosystem and the environmental consequences of climate variability. Globally, groundwater makes up 35% of the total freshwater withdrawals, constituting approximately 36%, 27% and 42% of water consumption for households, manufacturing, and agriculture, respectively (Döll et al., 2012). Although the general knowledge of scale-dependent hydraulic properties of the subsurface hydrologic systems is still quite limited, they prove to be increasingly influenced by anthropogenic factors (Küsel et al., 2016). Worldwide groundwater system can be affected by climate variability directly by change in recharge or indirectly by change in groundwater abstraction (Taylor et al., 2012). Furthermore, these effects may be adjusted through anthropogenic activities such as land use change. Many recent studies devote to evaluate the impact of climate change on groundwater availability (Engdahl and Maxwell, 2015; Goderniaux et al., 2015; Jackson et al., 2011; Taylor et al., 2012; Van Roosmalen et al., 2009; Stisen et al., 2011; Woldeamlak et al., 2007; Maxwell and Kollet, 2008; Havril et al., 2017). These past studies often use coupled climate-land-surface-subsurface models to investigate the potential response of groundwater storages to the outer forcings under different climate scenarios. Compared with the land surface processes, the groundwater reservoir is less vulnerable to extreme events (Maxwell and Kollet, 2008). The slow response of groundwater to meteorological variability can be explained by the highly dynamic surface water/groundwater interaction, the existence of variably thick unsaturated zone, and the big volume of groundwater storages. Quantification of uncertainty in future water resource projections and travel times (decades to centuries) of regional groundwater system is critically important for regional water sustainability.

Due to the diverse patterns of the terrestrial water cycle in regions under different climate conditions, climate change will have diverse impacts on the groundwater recharge change. Sandström (1995), for instance, found that in Tanzania, a 15% decline in precipitation, without any change in air temperature, will result in a 40-50% decline of groundwater recharge, indicating a potential amplified change of recharge compared to that of precipitation. While some studies found an increasing trend of recharge (Brouyère et al., 2004; Van Roosmalen et al., 2009), others indicate that climate change is likely to lead to decreased recharge rates (Pulido-Velazquez et al., 2015; Woldeamlak et al., 2007; Havril et al., 2017). The changes of recharge, regardless of sign of change, will significantly influence the groundwater levels, and may lead to ecological problems such as the vanishing of wetlands (Havril et al., 2017). Modification of groundwater recharge will control the flow paths and travel times of pollutants, which is critical to the sustainability of regional groundwater system. Moreover, the modification of groundwater recharge can change the age distribution for water in both the vadose zone and the saturated zone, as well as significantly change the composite age distribution (Engdahl and Maxwell, 2015).

Groundwater travel time distribution (TTD) is a robust description of the storage and transport dynamics within aquifers under various external forcings. It has many implications for hydrogeological and environmental studies. For instance, significant time-lags of the streamflow response to external forcings have been observed by multiple studies (Howden et al., 2010; Stewart et al., 2012). Besides, the legacy pollutants in groundwater reservoirs can have a great impact on the total pollutant loads for agricultural catchments (Wang et al., 2016; Van Meter et al., 2017). Groundwater TTD, as a lumped description of the heterogeneous aquifers, sheds light on the assessment of groundwater responses to non-point source contamination subjected to a changing climate and land use (Böhlke, 2002; Engdahl and Maxwell, 2015).

Although there are plenty of studies that have focused on assessing the impact of future climate change on groundwater recharge (Tillman et al., 2016; Crosbie et al., 2013; Jyrkama and Sykes, 2007; Pulido-Velazquez et al., 2015), groundwater budget (Pulido-Velazquez et al., 2015; Engdahl and Maxwell, 2015; Havril et al., 2017), and groundwater-surface water exchange (Scibek et al., 2007; Smerdon et al., 2007), there is an absence of a systematic evaluation of both the groundwater quantity and TTDs under different warming levels that incorporates the ~~uncertainty in climate projections~~uncertainties in both climate projection and hydrological parameterization. In this study, we analyze the response of groundwater (quantity and travel time distributions) to the 1.5, 2, and 3 °C global warming levels (above the preindustrial levels) in a central German basin (Nägelstedt) using a coupled hydrological model mHM-OGS. The key questions we aim to answer is: (1) How can the flow and transport conditions of a regional groundwater system in future decades differ from the historical period with respect to various possible warming levels? (2) ~~How much predictive uncertainty is associated with climate projection using different GCMs~~Can we quantify the degree of different uncertainty sources (e.g., uncertainties in climate projections and in groundwater models) and their influences on the final simulation results? To answer these questions, we pay particular attention to the assessment of long-term effect of climate change to the ~~groundwater systems using a well-tested sequentially-coupled model~~regional groundwater systems considering the buffering effect of groundwater aquifers.

This paper is organised into several sections, with each of them serving its own function. Section 2 describes the basic topographical, geometrical, and geological properties of the study area. Section 3 introduces the methodology and materials for this study. Section 4 shows the setup and validation for the mHM and OGS models. The simulation results are presented in

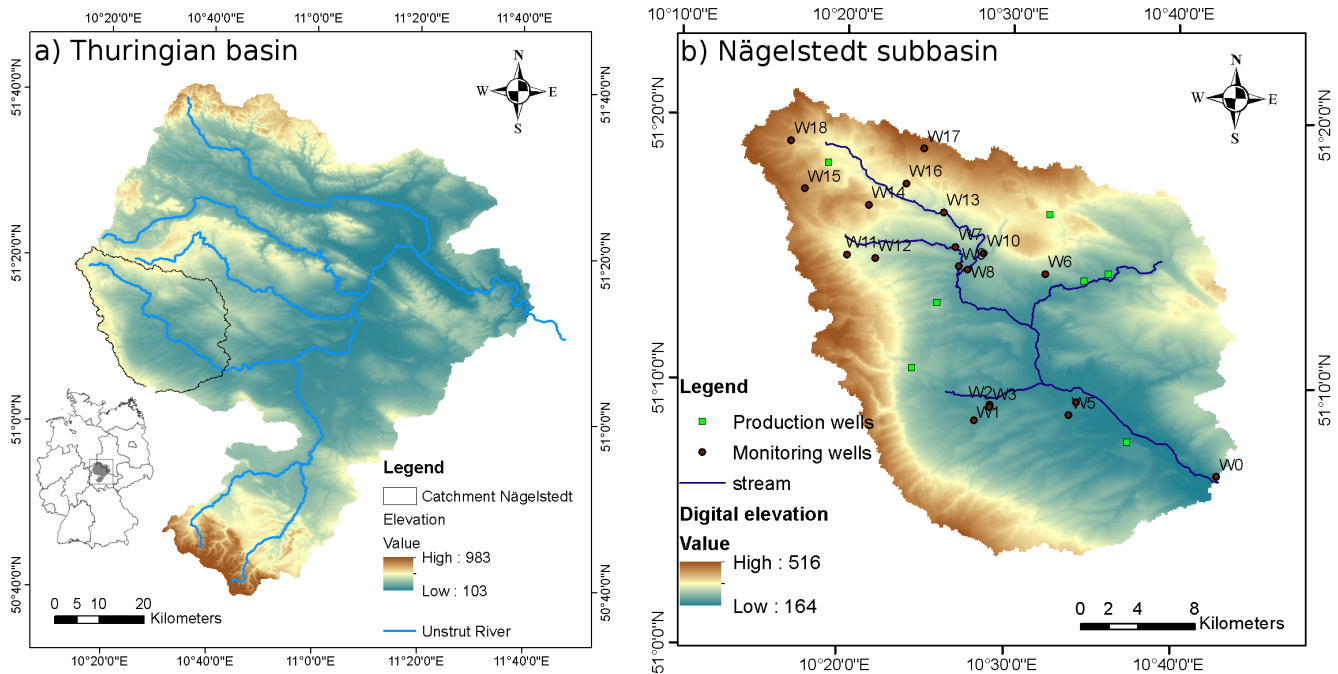

**Figure 1.** Study area and locations of pumping and monitoring wells within the Nägelstedt basin. Panel a) shows the relative position of Nägelstedt basin in the Thuringian basin, and Panel b) shows the locations of pumping and monitoring wells in Nägelstedt basin.

[Section 5. A comprehensive discussion on the simulation results is displayed in Section 6, and main conclusions are drawn in the end of this section.](#)

## 2 Study Area

As a sub-basin of the Thuringian basin, the Nägelstedt basin is located at central Germany and it has an area of about 850 km<sup>2</sup> (Figure 1). It is a headwater catchment of the Unstrut river. The Unstrut river is a typical, meandering lowland river with only moderate flow velocity under natural conditions. The mountains surrounding the Nägelstedt basin drain almost simultaneously into the Unstrut during heavy precipitation events, which in the past led to regular, prolonged flooding of large parts of the floodplains. The topographic elevations of this catchment range from 164 m at the southeastern lowland to 516 m in the Hainich mountainous region. This region is classified as a Cfb climate region based on the Köppen-Geiger classification, where Cfb stands for warm temperate, fully humid, and warm summer climate (Kottek et al., 2006). It shows a leeward decreasing trend of areal precipitation and an rising mean air temperature from the eastern Hainich ridge to the Unstrut Valley (Kohlhepp et al., 2017). In the larger Thuringian basin, groundwater has been intensively extracted for domestic, industrial and agricultural uses. About 70% of the fresh water requirement for Thuringia is satisfied by groundwater (Wechsung et al., 2008).

The extremely fertile soils in the meadows (wet black soil and loess) make the Thuringian basin one of the best agricultural basins in Germany. Approximately 88% of the total land use of this region is regarded as arable land (Wechsung et al., 2008). At the same time, the proportion of woodland and grassland has fallen sharply, leading to an extreme reduction in biodiversity in these areas (Wechsung et al., 2008). The nitrogen inputs from agriculture fluctuate with time and positions from 5 kg/ha to 31 kg/ha (Wechsung et al., 2008).

The stratigraphy in this area is characterized by a succession of carbonate–siliciclastic alternations. The main aquifer system consists of several sedimentary rocks, including the Middle Keuper (km), the Lower Keuper (ku), the Upper Muschelkalk (mo), the Middle Muschelkalk (mm), and the Lower Muschelkalk (mu) (Seidel, 2003). The Middle Keuper consists of a marly series with gypsum and dolomite, whereas the Lower Keuper is constituted of grey clays, schieferletten, and dolomitic limestone. The Upper Muschelkalk (Hauptmuschelkalk) is mainly made up of shelly limestone, marl and dolostone. The Middle Muschelkalk consists mainly of evaporites (gypsum, anhydrite and halite), meanwhile the Lower Muschelkalk consists of limestone and marls (Seidel, 2003; McCann, 2008; Jochen et al., 2014). Karstification occurs in the Muschelkalk formation, but has proved to be limited or concentrated in specific zones in this area (Kohlhepp et al., 2017).

The Nägelstedt basin is chosen as the study area for the following reasons: (1) It is a typical agricultural basin where potential non-point source contamination may threaten the sustainability and resilience of groundwater, and (2) the critical zone (CZ) in Nägelstedt basin has been comprehensively investigated using infrastructure platform from the Collaborative Research Center AquaDiva (Küsel et al., 2016; Kohlhepp et al., 2017).

### 3 Methodology and Materials

To investigate the impact of different climate change scenarios, we modified the modeling framework originally developed by Thober et al. (2018) and Marx et al. (2018) from EDgE and HOKLIM projects by means of coupling it to a three-dimensional subsurface model. Specifically, we use temperature and precipitation derived from five GCMs under three different RCPs to force the mesoscale Hydrologic Model (mHM), aiming to derive the land surface fluxes and states under different future warming scenarios. The projected recharges from mHM calculations are fed to the groundwater model OpenGeoSys (OGS) for the assessment of groundwater quantity and travel time distributions.

#### 3.1 Climate scenarios

We use five General Circulation Models (GFDL-ESM2M, HadGEM2-ES, IPSL-CM5A-LR, MIROC-ESM-CHEM, and NorESM1-M) gathered from the Coupled Model Inter-comparison Projects 5 (CMIP5) to provide the climate variables to the mHM model. Temperature and precipitation are derived from these GCMs under three representative concentration pathways (RCPs; RCP2.6, RCP6.0, and RCP8.5), which are available from ISI-MIP project (Warszawski et al., 2014). RCPs are representations of emission scenarios, with RCP2.6, RCP6.0, and RCP8.0 representing low, medium, and high emission scenarios, respectively. This multimodel ensemble approach enables the consideration of uncertainty in climate modeling. Climate variables from GCMs are further downscaled to a 0.5 °C spatial resolution by means of a trend-preserving bias correction approach

**Table 1.** Time periods of 1.5, 2, and 3 °C global warming in five GCMs under three RCPs.

| Warming level | RCPs | GFDL-ESM2M | HadGEM2-ES | IPSL-CM5A-LR | MIROC-ESM-CHEM | NorESM1-M |
|---------------|------|------------|------------|--------------|----------------|-----------|
| 1.5 °C        | 2.6  | -          | 2007–2036  | 2008–2037    | 2006–2035      | 2047–2076 |
|               | 6.0  | 2040–2069  | 2011–2040  | 2009–2038    | 2012–2041      | 2031–2060 |
|               | 8.5  | 2021–2050  | 2004–2033  | 2006–2035    | 2006–2035      | 2016–2045 |
| 2 °C          | 2.6  | -          | 2029–2058  | 2060–2089    | 2023–2052      | -         |
|               | 6.0  | 2060–2089  | 2026–2055  | 2028–2057    | 2028–2057      | 2054–2083 |
|               | 8.5  | 2038–2067  | 2016–2045  | 2018–2047    | 2017–2046      | 2031–2060 |
| 3 °C          | 2.6  | -          | -          | -            | -              | -         |
|               | 6.0  | -          | 2056–2085  | 2066–2095    | 2055–2084      | -         |
|               | 8.5  | 2067–2096  | 2035–2064  | 2038–2067    | 2037–2066      | 2057–2086 |

(Hempel et al., 2013). The trend-preserving bias correction approach is capable of representing the long-term mean and extremes of catchment state variables (Hempel et al., 2013). The 0.5 degree data is further interpolated into  $5 \times 5 \text{ km}^2$  grids by means of external drift kriging (EDK) approach. The EDK approach can incorporate altitude effects at sub-grid scale, and has been successfully used in many past studies (Wood et al., 2011; Zink et al., 2017; Thober et al., 2018).

5 We use the period 1971–2000 to represent current climate conditions because 1991–2000 is the latest decade that are available in the GCM data. The GCM data from this period serves as a baseline scenario for the future projection of climate change. A time-sampling approach is applied to estimate the time span for different global warming level of 1.5, 2, and 3 °C (James et al., 2017). The five GCMs have different degrees of climate sensitivity due to the different climate projections, therefore providing different meteorological forcings to the mHM model. Specifically, different time periods of 1.5, 2, and 3 °C global  
10 warming are estimated by five GCMs under three RCPs (Table 1). We note that some combinations of GCMs and RCPs cannot be identified for the future climate projection before 2099, resulting in a total of 35 GCM/RCP combinations being used in this study (Table 1).

### 3.2 The mesoscale Hydrologic Model (mHM)

The disaggregated meteorological data are used as meteorological forcings of the mesoscale Hydrological Model (mHM) for a  
15 daily simulation. mHM is a spatially explicit distributed hydrologic model that applies grid cells as primary hydrologic units, and accounts for multiple hydrological processes including infiltration, surface runoff, evapotranspiration (ET), soil moisture dynamics, snow accumulation and melting, groundwater recharge, and discharge generation. mHM is forced by hourly or daily meteorological forcings (e.g., precipitation and temperature), and uses accessible physical characteristics including soil  
20 textural, vegetation, and geological properties to estimate the spatial variability of parameters by means of its unique Multiscale Parameter Regionalization (MPR) technique (Samaniego et al., 2010; Kumar et al., 2013). The MPR technique is capable of coping with fine-scale features because the effective model parameters are regionalized on the basis of the underlining subgrid-

scale information using a consistent upscaling algorithm. The mHM simulations have been successfully established across Europe, and the simulated land surface fluxes have been verified by eddy-covariance stations across Germany (Zink et al., 2017).

### 3.3 OpenGeoSys (OGS)

5 The porous media simulator OpenGeoSys (OGS) is used to simulate regional groundwater flow and transport processes. OGS has been successfully coupled to mHM through a coupling interface – mHM-OGS (Jing et al., 2018b). The coupling interface interpolates the grid-based recharge produced by mHM into the nodal recharge values spreading over the top surface of OGS-mesh. In doing so, mHM and OGS are dynamically coupled as a surface-subsurface model such that the potential recharge produced by mHM can be fed to OGS and serves as outer forcing of the groundwater module (Jing et al., 2018b). Specifically  
10 in this study, we feed the projected  $5 \times 5 \text{ km}^2$  recharge from mHM under future climate scenarios to the coupling interface (mHM-OGS) to force the groundwater model. OGS is based on the finite element method (FEM) and solves the partial differential equations (PDEs) of fluid flow by means of linear/non-linear numerical solver. OGS is capable of simulating single processes including saturated zone flow, unsaturated zone flow, and solute transport, as well as coupled processes including saturated/unsaturated flow, multi-phase flow, and reactive transport. Specifically in this study, OGS is used to compute three  
15 dimensional saturated zone flow.

Moreover, a Lagrangian particle tracking method – namely random walk particle tracking (RWPT) – is used to track flow pathways and compute travel time distributions of water parcels (Park et al., 2008a, b; Jing et al., 2018a). The RWPT method assumes that the advection process is deterministic, while the diffusion/dispersion processes are modeled stochastically (Park et al., 2008a). The RWPT method has been widely used to account for reactive transport processes and travel times (Park et al.,  
20 2008b; Jing et al., 2018a; Engdahl, 2017).

## 4 Model setup

We designed two parallel numerical experiments to investigate the effect of uncertainties in both the climate and groundwater models on the groundwater resources. For the evaluation of climate uncertainty, 35 GCM/RCP pairs are used, whereas only one parameter set is used for the groundwater model. In parallel, to assess the parameter uncertainty in groundwater model, one sole climate scenario is used, whereas many realizations of parameters constrained by the observations are used for the groundwater model. This climate scenario is produced by calculating the ensemble average of all 35 members of climate scenarios.

25

### 4.1 mHM model setup

Fed by the five GCMs, the down-scaled meteorological dataset with a spatial resolution of  $5 \times 5 \text{ km}^2$  is used as the outer forcing of mHM. The model is set up across Europe using land use dataset and is forced with spatially distributed meteorologic  
30 observations obtained from E-OBS dataset (Haylock et al., 2008). Global parameters of mHM are calibrated against discharge observations using the GRDC database. All ensemble simulations are established with the same morphological, land use, and

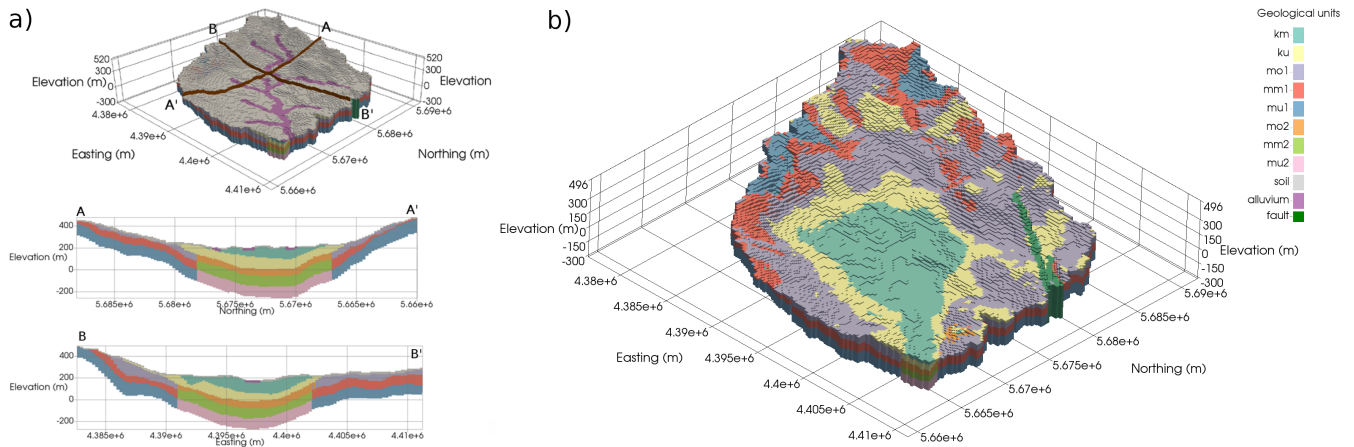

**Figure 2.** Geological zonation and three-dimensional mesh for the aquifer system in Nagelstedt basin (Jing et al., 2018b). Panel (a) underlines the spatial pattern of alluvium and soil layers. Panel (b) further displays the zonation of deep geological units. Full names of legends are listed as follows: km – Middle Keuper, ku – Lower Keuper, mo – Upper Muschelkalk, mm – Middle Muschelkalk, mu – Lower Muschelkalk.

soil type data in order to keep the relevant parameters consistent throughout this study. Furthermore, the mHM model was validated using observations from many gauging stations across Europe with a period 1966-1995 (Marx et al., 2018). The calibration-constrained parameter set is derived and used for groundwater recharge projection. The projected groundwater recharge, with a spatial resolution of  $5 \times 5 \text{ km}^2$ , is further downscaled to a  $250 \times 250 \text{ m}^2$  spatial resolution using the bilinear interpolation in the study site for OGS groundwater model.

## 4.2 OGS model setup

A 25-m Digital Elevation Model (DEM) is used to determine the outer bounds of the catchment and the top surface elevation of three-dimensional model domain. A three dimensional stratigraphic mesh is set up on the basis of above information and bore log data from Thuringian State office for the Environment and Geology (TLUG) (Fischer et al., 2015). The mesh consists of 293,041 structured hexagonal elements with a size of 250 m in the  $x$  and  $y$  direction as well as with a 10 m resolution in the  $z$  direction. The parameter zonation approach is used to represent the heterogeneity of hydraulic properties–hydraulic conductivity in this study. The geological zones within the three-dimensional mesh representing Nagelstedt catchment are displayed in Figure 2. Ten different sediment units are delineated based on the stratigraphy in this area, including Middle Keuper (km), Lower Keuper (ku), Upper Muschelkalk 1 (mo1), Upper Muschelkalk 2 (mo2), Middle Muschelkalk 1 (mm1), Middle Muschelkalk 2 (mm2), Lower Muschelkalk 1 (mu1), Lower Muschelkalk 2 (mu2), alluvium, and the uppermost soil layer (Figure 2). The geological unit “alluvium” represents sandy outwash and gravel near streams, whereas “soil” denotes the uppermost soil layer with a depth of 10 m. ~~The post-calibrated values of the hydraulic conductivity in each geological unit obtained from a previous study are assigned to the corresponding geological layers of the mesh~~



**Table 2.** ~~Main hydraulic~~ Hydraulic parameters used for ~~the groundwater model~~ ensemble simulations with different climate scenarios.

| Geological units | Hydraulic conductivity (m/s) | Porosity (-) |
|------------------|------------------------------|--------------|
| km               | $1.145 \times 10^{-4}$       | 0.2          |
| ku               | $3.714 \times 10^{-6}$       | 0.2          |
| mo1              | $3.936 \times 10^{-4}$       | 0.2          |
| mm1              | $2.184 \times 10^{-4}$       | 0.2          |
| mu1              | $2.258 \times 10^{-5}$       | 0.2          |
| mo2              | $3.936 \times 10^{-5}$       | 0.2          |
| mm2              | $2.184 \times 10^{-5}$       | 0.2          |
| mu2              | $2.258 \times 10^{-6}$       | 0.2          |
| alluvium         | $1.445 \times 10^{-3}$       | 0.2          |
| soil             | $3.026 \times 10^{-4}$       | 0.2          |

For the uncertainty study of climate scenarios, a post-calibration hydraulic conductivity field sampled from many realizations that are all constrained by head observations is adopted for the OGS groundwater model (Table 2). In parallel, to assess the groundwater model uncertainty, 80 realizations of hydraulic conductivity fields randomly sampled from many hydraulic conductivity fields are used to cover a plausible range of values (Jing et al., 2018a). Meanwhile, a uniform porosity of 0.2 is

5 assigned to each geological ~~layers~~ layer (Table 2).

Given that this study is designed to assess the potential response of regional groundwater system to global warming scenarios, a steady-state groundwater system could be assumed. This assumption is made because the future warming level is a long-term average, and on such a temporal scale (decadal), the short-time fluctuations of climate forcings are essentially damped in the regional groundwater system (Maxwell and Kollet, 2008).

10 The bottom and outer boundaries of model domain are impermeable, and no-flow boundary conditions are assigned onto these geometries. The spatially distributed recharges estimated by mHM under future climate scenarios are mapped onto each grid ~~nodes~~ node of the mesh surface by the model interface (mHM-OGS). Long-term averaged pumping rates are assigned as Neumann boundaries to each production ~~well~~ well, wherein the pumping rates are obtained from the literature on the basis of long-term historical data (Wechsung et al., 2008). The total long-term averaged pumping rate over the Nagelstedt catchment is

15 18870 m<sup>3</sup>/day, and it is set constant for all climate scenarios. A fixed head boundary is assigned to the main perennial streams including one mainstream and three tributaries (Figure 1). For the Lagrangian particle tracking model, about 100000 spatially distributed particle tracers are injected through the top surface of mesh. The spatial distribution of particle tracers is consistent with the spatial distribution of simulated diffuse recharges for each climate scenario.

### 4.3 Model verification

20 We use the observed discharge and groundwater head over a period of 50 years (1955-2005) to verify the mHM and OGS model. The established mHM model for the study area has been verified using the observed discharges at the outlet of the

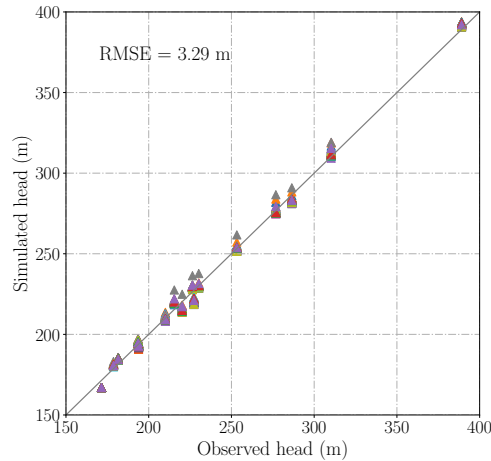

**Figure 3.** Groundwater model verification: comparison of simulated to observed groundwater heads at several monitoring wells using 80 different hydraulic conductivity fields.

catchment in the previous study (Jing et al., 2018b). The OGS groundwater model has also been successfully verified using the long-term averaged head observations at many monitoring wells (Figure 3). Figure 3 reveals that all 80 sets of hydraulic conductivity fields are compatible with the groundwater head observations with a small value of Root Mean Square Error (RMSE) being observed.

## 5 Results

This section displays the ensemble of simulated changes in groundwater recharges, levels and travel time distributions. For the sake of clarity, we use plus sign to represent simulated values of increases and minus sign to represent decreases.

### 5.1 Impact-Climat impact on groundwater recharge

Relative changes of simulated mean annual recharges under 1.5, 2, and 3 °C warming using five GCMs are shown in Figure 4. Projected changes of mean annual recharge vary from -4% to +15% for 1.5 °C warming level, meanwhile those range from -3% to +19% for 2 °C warming level. The simulated changes under 3 °C warming scenario range from -8% to +27%. The simulation results from 29 out of 35 total GCM/RCP combinations suggest an increase of groundwater recharge, while only 6 individual simulations projected decreased recharge rates. The projected changes are more dependent on the used GCMs than the RCPs, which can be expected because differences among RCPs are weakened by analyzing different warming levels. Nevertheless, differences in recharge induced by different RCPs can still be witnessed in Figure 4, indicating the necessity of considering multiple GCM/RCP combinations for providing a plausible range of predictive uncertainty. The ensemble averages of relative changes suggest an increase of 8.0%, 8.9%, and 7.2% for the 1.5, 2, and 3 °C warming, respectively. Meanwhile,

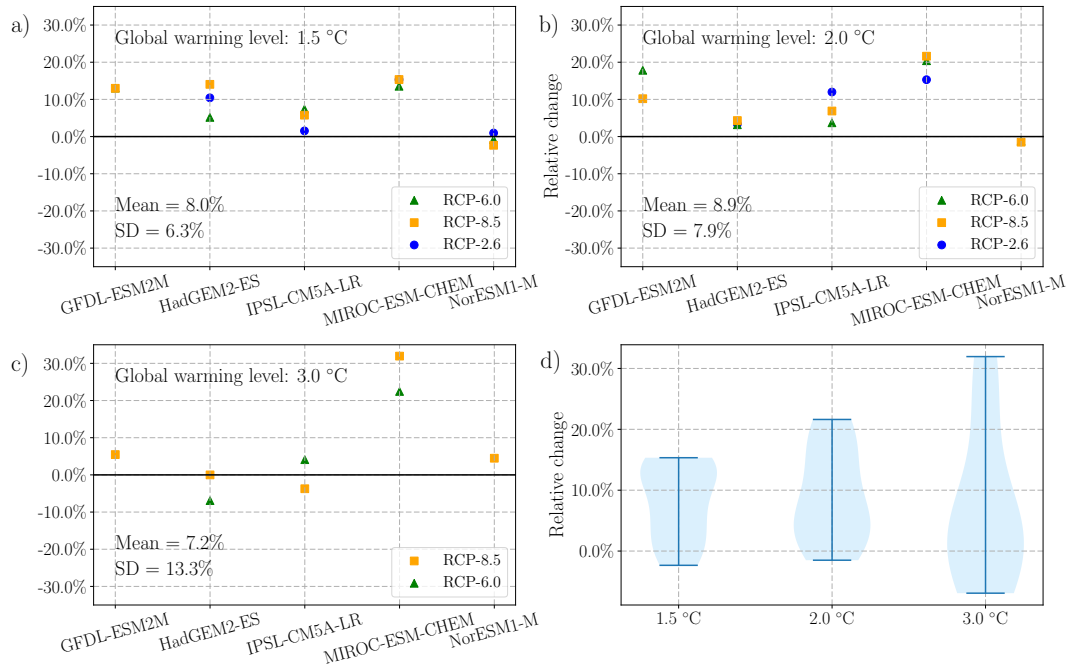

**Figure 4.** Projected changes in groundwater recharge rate under three warming scenarios compared to the baseline scenario 1971-2000. Panel a), b), and c) are the scatter plots showing the individual simulation results, and panel d) is the violin plot showing the uncertainty of ensemble simulations.

the standard deviations (SDs) exhibit an increasing tendency with the increasing warming level. With the increase of global warming level, the predictive variability in groundwater recharge is also expected to increase (Figure 4b).

Generally, calculations indicate that the groundwater recharge rate is expected to be greater than the 1971-2000 average. The increases in groundwater recharge are below 20% in the majority of GCM/RCP realizations, whereas three GCM/RCP realizations suggest a decrease of groundwater recharge in the study area. The simulation under 3 °C warming scenario represents the greatest SD, i.e., the greatest predictive uncertainty. Note that the predictive uncertainty is mainly introduced by the climate projection using various GCM/RCP combinations, given that mHM is the only hydrologic model used in this study and the parameter values are the same for all simulations.

## 5.2 Impact Climate impact on groundwater levels

10 Changes of simulated spatially distributed groundwater levels under future climate scenarios using the minimum, median, and maximum projected recharges are shown in Figure 5. Generally, the areas of topographically-driven flow (e.g., slope) appears to be more sensitive to the changes of recharge compared to the lowland plain. Under 1.5 °C warming scenario, simulated groundwater levels using maximum recharges present an increase ranging from 0 to 10 m compared to those under baseline scenario, whereas those using minimum recharges exhibit a slight decrease. Under 2 °C warming scenario, groundwater levels

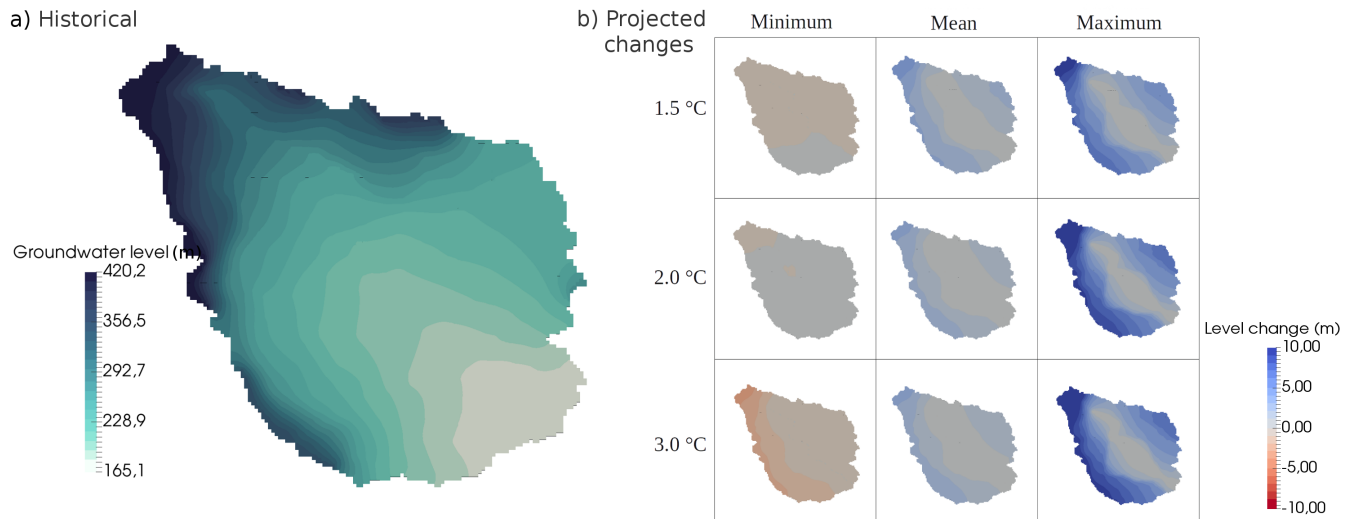

**Figure 5.** Contour maps of groundwater levels in Nägelstedt catchment. Panel a) shows the long-term average of groundwater levels in the historical period 1971-2000. Panel b) shows the changes in simulated groundwater levels under 1.5 °C, 2 °C, and 3 °C warming scenarios compared to the baseline scenario 1971-2000 using the maximum, median, and minimum projected recharges.

are expected to increase compared to the base case using median and maximum projected recharges, whereas marginal differences can be found in the simulated levels using minimum projected recharge. Under 3 °C warming scenario, the simulated changes in groundwater levels show the highest variation among the three warming scenarios. Simulations using the maximum recharge suggest a significant increase of groundwater level compared to the 1971-2000 historical average, while simulation using the minimum recharge results in a moderate decrease of groundwater levels (up to a decrease of 5 m at northeastern mountain).

Figure 6 further shows the changes in groundwater levels at several monitoring wells, of which the locations are displayed in Figure 1. In general, changes in groundwater levels are induced by the changes in groundwater recharge such that more groundwater recharge results in higher groundwater levels and vice versa. The uncertainty of groundwater level changes increases following the continuous global warming from 1.5 °C to 3 °C, which can be evidenced by an increasing standard deviation of simulated groundwater levels from 2.20 m for 1.5 °C warming to 4.70 m for 3 °C warming (Figure 6). The forecasts of groundwater levels present a wide range-of-spread variation associated with the variability of GCMs. Simulated groundwater levels tend to have the largest increase under three global warming scenarios using meteorological forcings from MIROC-ESM-CHEM model. In contrast, simulated groundwater levels using meteorological forcings from NorESM1-M model show minimal changes compared to the baseline scenario. Although differing in magnitude, the changes of groundwater levels for different wells show a consistent trend (either increasing or decreasing) under the same GCM/RCP realization. The simulations show no systematic relationship between the change in groundwater levels and the change in global warming level, but they do

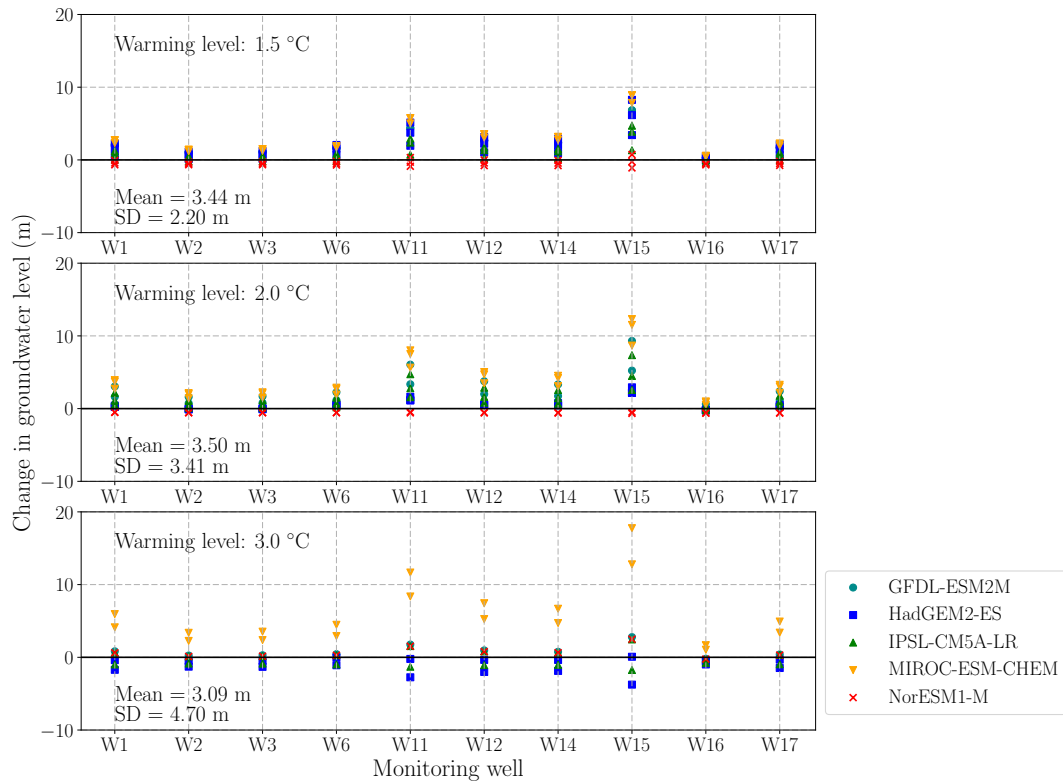

**Figure 6.** Changes of simulated groundwater levels in monitoring wells under three warming scenarios compared to the baseline scenario. The positions of monitoring wells are shown in Figure 1b.

indicate an increased variability in groundwater level change following the increased warming level – which can be evidenced by the increased SD values from 1.5 to 3 °C warming level (Figure 6).

Overall, calculations of spatially distributed groundwater levels help to understand more of the response of groundwater quantity to the projected climate change, but they provide little clue on the change in groundwater transport process. A strong spatial variability in changes of groundwater levels reveals the high sensitivity for climate change in mountainous areas and relatively low sensitivity in lowland plain areas.

### 5.3 Impact Climate impact on groundwater travel time distributions

Travel time distributions (TTDs) provide a robust description of the flow pathways of water parcels through the subsurface as well as the storage of groundwater within it. Simulated TTDs in Nägelstedt catchment under 1.5, 2, and 3 °C warming scenarios are shown in Figure 7. Figure 7a) shows the probability density function (PDF) of TTDs for the ensemble simulations. Generally, the simulated PDFs show a fairly consistent shape with a long tail extending to hundreds of years for all GCM/RCP combinations. The long-tail behavior of simulated PDFs of TTDs can be explained by the direct influence of hydro-stratigraphic

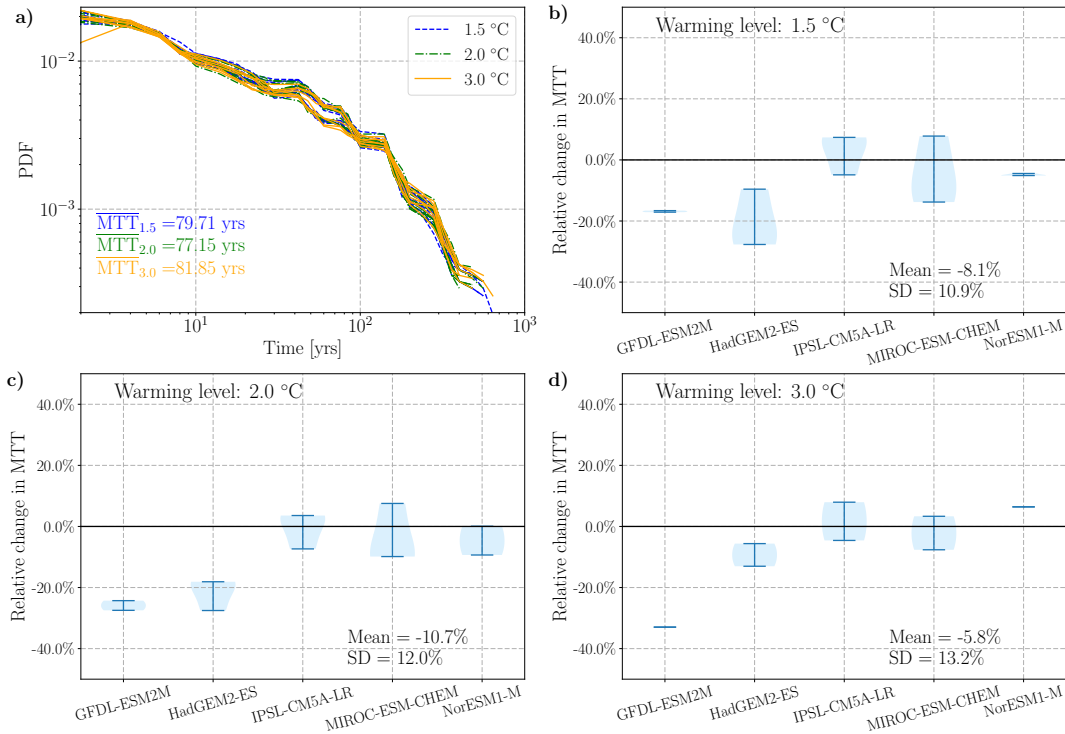

**Figure 7.** Simulated TTDs in Nägelstedt catchment under 1.5 °C, 2 °C, and 3 °C warming scenarios. Panel a) shows the probability density function (PDF) of TTDs for the ensemble simulations. Panels b), c), and d) show the relative changes of mean travel times (MTTs) under future climate scenarios compared to the base case.

aquifer system, whereby some geological units present very low hydraulic conductivity values (e.g., mm<sup>2</sup> and μm<sup>2</sup>) and therefore, remarkably slow down the movements of particles in these layers. The mean travel time (MTT), which by definition is the mass-weighted average of travel times for all water parcels within the simulated subsurface system, is a typical metrics for characterizing the timescales of catchment storage. The calculated ensemble averages of MTTs for 1.5, 2, and 3 °C warming scenarios do not exhibit notable differences (79.71, 77.15, and 81.85 years, respectively).

To analyze the trend of MTTs under future climate scenarios, the relative changes of MTTs under 1.5, 2, and 3 °C warming scenarios are shown in panels b), c), and d) of Figure 7. In general, simulations using the data from GFDL-ESM2M and HadGEM2-ES tend to decrease MTTs compared to the base case. Simulations using meteorological data from IPSL-CM5A-LR and MIROC-ESM-CHEM, however, do not agree on the sign of changes in MTTs with a maximum relative change of less than 10%. The ensemble average shows that the MTT is expected to decrease in future time periods than the historical average, but a small number of ensemble simulations suggest an increase in MTT. This degree of variability is propagated from the variation in projected recharges using different GCM/RCP combinations. The simulations do not show any systematic relationship between the change in TTDs and the change in warming level, but they do show an increased uncertainty in

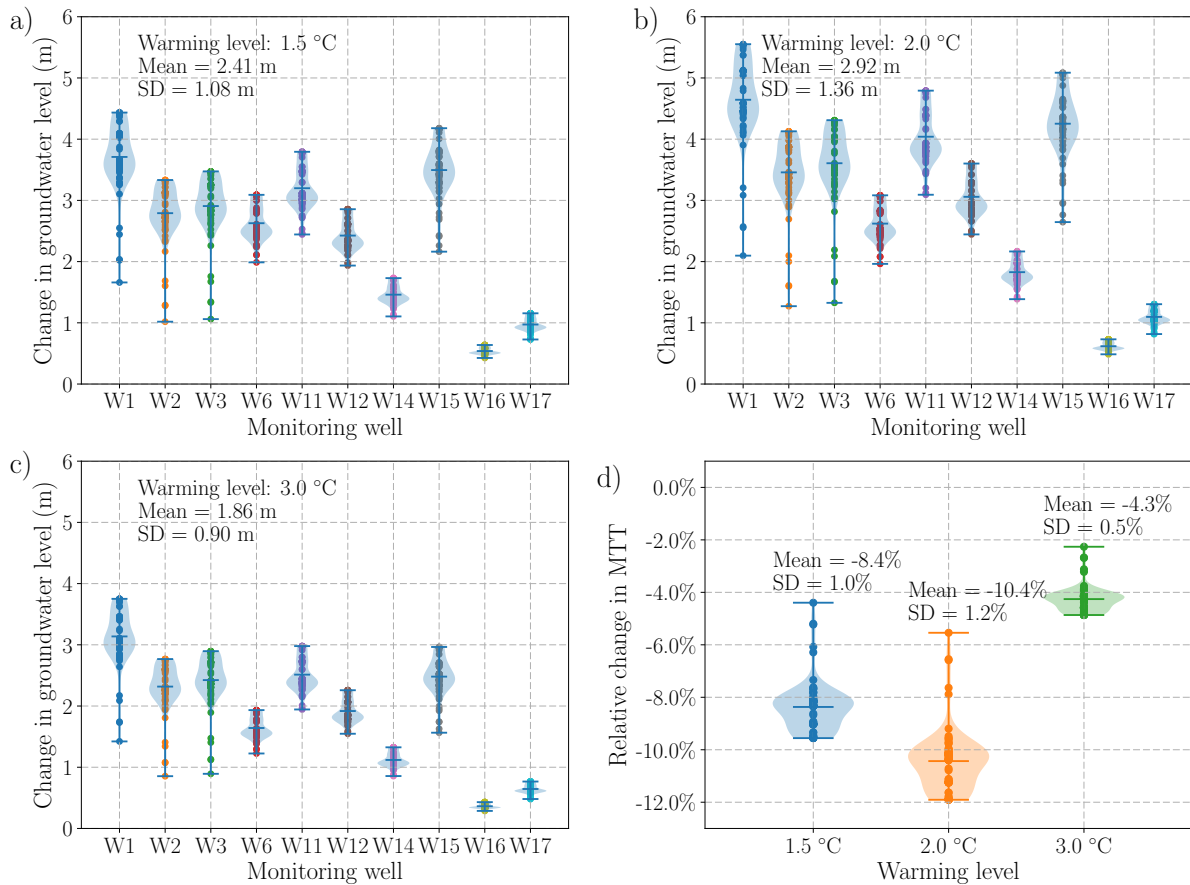

**Figure 8.** [The predictive uncertainty in simulation results related to different hydraulic conductivity fields. Panel a\), b\), and c\) show the changes in groundwater levels, whereas panel d\) shows the projected relative changes in MTTs using 80 different hydraulic conductivity fields.](#)

projected change in TTDs following the increased warming level – which can be demonstrated by the increased SD values from 1.5 to 3 °C warming (Figure 7).

Overall, changes in the simulated TTDs provide more details on the response of the system to the climate change and how the water cycle is impacted other than considering only the groundwater quantity. The simulated changes in MTTs exhibit a higher variability than the simulated changes in groundwater levels. This is partially because the simulated recharges have different spatial patterns for different GCM/RCP realizations and the TTDs are more sensitive to the spatial pattern of diffuse recharge than the groundwater levels are (Barthel and Banzhaf, 2015; Jing et al., 2018a).

#### 5.4 [Predictive uncertainty related to the groundwater model](#)

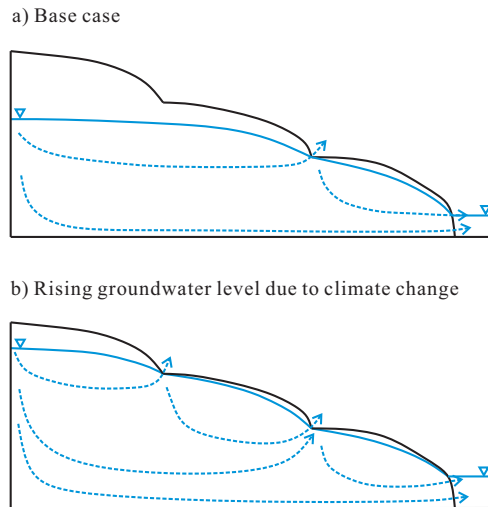

**Figure 9.** Conceptual graph showing the influence of rising groundwater level on the regional groundwater flow pattern in due to climate change.

This subsection displays simulation results using 80 different hydraulic conductivity fields that are all conditioned by the head observations and reality. Note that only one climate scenario is used for this group of simulations, which guarantees the simulation results are only controlled by different hydraulic conductivity values. Figure 8 displays the spread of changes in simulated groundwater levels and MTTs using 80 different hydraulic conductivity fields. The spreads of results vary with the location of monitoring well, provided that the local topographic and hydraulic properties around each monitoring well are different. Wells near the mainstream (e.g., W14 and W16) show smaller variations than those far away from the mainstream (e.g., W1, W3, and W15), indicating the buffering effect of groundwater aquifer. By comparing the spread of projected changes in groundwater levels in Figure 8 to those in Figure 6, we find that the spreads induced by different GCM/RCP pairs are remarkably larger than those induced by hydraulic conductivity fields. Moreover, the sign of projected changes in groundwater levels in Figure 6 can be either positive or negative, whereas those in Figure 8 show a consistent positive sign. The spread of projected relative changes in MTTs ranges from -12.0% to -2.4%, which is also significantly smaller than that related to different climate scenarios (Figure 8d). This comparison indicates that predictive uncertainties in groundwater level are primarily contributed by climate projections and secondly by hydraulic parameters.

## 6 Discussion and conclusions

We systematically explore the response of a regional groundwater flow system to different global warming scenarios by means of the sequential coupling of a computationally-efficient land surface model (mHM) and a physically-based groundwater model (OGS). The results of ensemble simulations manifest that groundwater recharge is likely to increase moderately for all three warming levels. However, the ensemble simulations do not all agree on the sign of relative change. This finding is



consistent with a previous finding that low flows are expected to increase slightly in this region under future climate scenarios, considering that baseflow is the main component of low flow and recharge feeds the baseflow (Marx et al., 2018). Similar increasing trend in climate-induced recharge rates has been suggested by many researchers for other regions such as a northern European catchment (Treidel et al., 2012), high plains of USA (Cornaton, 2012), upper Colorado catchment (Tillman et al., 2016) and Snake River basin (Sridhar et al., 2017). Meanwhile, the seasonal pattern of recharge can be significantly modified by climate change (Chen et al., 2018).

The simulated changes in groundwater levels also manifest similar increases for all three warming scenarios, but show a strong spatial variability depending on the local topography and elevation. These changes can be critical to groundwater/surface water interaction because the increase or decrease in groundwater table would modify the dynamics of groundwater discharge into streams (Havril et al., 2017). Rising-In areas with complex topography and dense drainage network, rising groundwater level may activate shallow groundwater flow paths and intensify shallow local flow pathways (Figure 9). This way, the mixing behavior of groundwater storage can also change, because the activation of shallow flow paths will lead to a stronger systematic preference for discharging young water (Kaandorp et al., 2018; Jing et al., 2018a). Those above mentioned processes can be properly reproduced by the coupled model mHM-OGS, given that the coupled model is physically based and is capable to explicitly represent the spatial heterogeneity. Moreover, changes of groundwater levels will impact the land surface processes such as evapotranspiration, soil moisture dynamics and overland flow (Kollet and Maxwell, 2008; Huntington and Niswonger, 2012).

The remarkable influence of climate change on the catchment-scale groundwater travel time distributions is of critical importance to the sustainability of the hydrological system. Simulated mean travel times suggest a moderate decline for three warming scenarios, which is not surprising since the travel time of water parcels is directly controlled by the recharge rate. With simulated weighted-average MTTs being at a centurial scale, climate-induced variations can significantly affect the long-term sustainability of regional groundwater system. Decline in groundwater MTTs will remarkably shorten the life span of non-point source pollutants (e.g., nutrient and pesticide) in groundwater aquifers and change the spatial and temporal distributions of pollutant concentrations within the aquifer system. Given that the nutrient budget of the connected surface water body is linked with groundwater system, water quality of the surface water body in this region (e.g., the Unstrut river) will response accordingly in the future, although with a long delay. This finding is inline with many recent studies, wherein they highlight the importance of legacy nutrients in catchments as a reason for long-term catchment response (Haygarth et al., 2014; Van Meter et al., 2017).

One essential topic when assessing future climate impact is uncertainty. Within the ensemble-simulations-simulations using the ensemble of GCM/RCP combinations, simulated changes in variables (e.g., recharge, groundwater level, and mean travel time) vary not only in absolute value, but also in sign (positive or negative) because of the large variations in different climate projections. The contribution of climate scenarios to the predictive uncertainty, is also found to be greater than that of hydraulic parameters in groundwater model. Within the current modeling framework, predictive uncertainty and error may also be introduced by other sources, such as the internal variability in climate projection using different initial states, internal parameter uncertainty in mHM model, ~~the parameter uncertainty in OGS model~~, and the down-scaling algorithm. Enhancements in cli-

mate projection and downscaling algorithms can effectively reduce the variability in projected impacts of global warming on the regional groundwater system. Nevertheless, the dominant source of uncertainty is highly likely to lie in the climate projections using various GCMs and RCPs (Taylor et al., 2012; Thober et al., 2018; Marx et al., 2018). Except the above mentioned climate projection uncertainty, other uncertainty sources have not been assessed in this study. This fact indicates that the range of predictive uncertainty estimated in this study is only a conservative estimation.

A potential limitation of ~~this study is the~~ current modeling framework lies in the one-way coupling approach that neglects the feedback from groundwater level change to the land surface processes. The change in groundwater table can alter the partitioning of water balances, which further exerts a second-order impact on the groundwater level and travel times (Liang et al., 2003; Leung et al., 2011). The fully coupled system, based on a mixed form of the Richards equation to solve unsaturated and saturated zone flow simultaneously, is more realistic than the one-way coupled system. However, fully coupled model consistently suffers from expensive computational burden, which limits its applicability in large-scale real-world models. It also introduces extra parameters that are essentially unknown at the catchment scale. The current one-way coupling, although less accurate than the two-way coupling, is computationally more efficient – allowing us to understand the first order control of climatic variability on groundwater characteristics (groundwater level and travel times). Notably, the applied Lagrangian particle tracking in the 3D groundwater model is computationally very expensive. The total computational time performing a single model run is around 14 days using 8 cores on a super computer facility. Moreover, we have successfully demonstrated the utility of this model for adequately capturing the observed behavior of groundwater levels across the study basin (Jing et al., 2018b). Accordingly the one-way coupling method used here is a practical choice, allowing us to perform the large ensemble scenarios with reasonable computational resources (and time).

The second potential limitation of this study is the contradiction between fine-resolution groundwater model and coarse-resolution mHM simulations. mHM simulations in this study were established within the scope of HOKLIM project, which focuses on the impact of future climate scenarios on European water resources. All databases used for mHM model setup are on a European scale and typically have coarse spatial resolutions (e.g.,  $5 \times 5 \text{ km}^2$ ). Although the MPR technique embedded in mHM facilitates the characterization of subgrid-scale features, it does not guarantee that all subgrid-scale features can be captured if the resolutions of input data are too coarse. We note that this is a common problem when utilizing coarse-resolution forcings to drive fine-resolution physically-based models. Simulation results in this study can be considered as first-order approximations on the basis of currently available databases. The conclusions drawn in this study can be tentative and therefore, open to revision.

The steady-state nature of simulations is reasonable for the assessment of long-term climate impact on regional groundwater system because 1) it reduce the computational burden, 2) the temporal fluctuations under the future climate cannot be reasonably projected, and 3) high-frequency fluctuations in external forcings have minor influences on long-term travel time distributions (Engdahl, 2017). However, transient behavior can be very important for many cases where the temporal scale is small and the input forcings are highly dynamic. In recent years, the subject of transient behavior of TTDs has become more and more prevalent in groundwater hydrology (Woldeamlak et al., 2007; Cornaton, 2012; Engdahl, 2017).

We note that the results in this study are only suitable for the Nagelstedt site in central Europe. In other regions of Europe, groundwater recharge change induced by global warming may have distinct behaviors than those shown in this study. For example, some studies indicate an decrease in groundwater quantity in Mediterranean regions due to the decrease in projected precipitation (Pulido-Velazquez et al., 2015; Moutahir et al., 2016). Besides, baseflow is also expected to decrease, leading to an potential increase in drought in Mediterranean regions (Marx et al., 2018; Samaniego et al., 2018).

We only consider the direct impact (i.e., impacts exerted through changed precipitations) of climate change on the regional groundwater system. Interactions between the climate and groundwater are exacerbated by land use change, which is mainly exerted by the intensification of irrigated agriculture. In south Australia and southwest U.S., the transition from natural catchments to rain-fed cropland significantly changes the groundwater storage through the increase in recharge (Taylor et al., 2012). The indirect influence of global warming to groundwater systems has not been considered in this study. This influence can be a dominant factor threatening the local groundwater system for many regions worldwide (Taylor et al., 2012). Future investigations are needed to incorporate both the direct and indirect impacts of global warming on the sustainability of regional groundwater system.

To summarize, climate change ~~has non-negligible second-order impacts on groundwater hydrology although first-order impacts are small~~ can significantly alter the quantity and travel time behavior of regional groundwater system through the modification of recharge, especially for the long term. Ensemble simulations indicate remarkable predictive uncertainties in regional groundwater quantity and travel times, which are introduced primarily by climate projection, and secondly by groundwater model. In the study domain, moderate absolute changes in recharge rates, groundwater levels, and travel times that are independent of nonlinearly related with the amount of global warming are found. However, the variability of these changes increases with the amount of global warming that might also affect the cost of managing the groundwater system. This increased variability indicates an increased possibility of extreme events in groundwater system following the increase in warming level. Therefore, it is still advisable to ~~reduce~~ restrain global warming to 1.5 °C and avoid a global warming of 3 °C.

*Code availability.* The coupled model mHM-OGS can be acquired via the following online repository: <https://doi.org/10.5281/zenodo.1248005>.

*Author contributions.* Conceptualization and methodology, M.J, R.K, F.H.; software, M.J., R.K., S.T, L.S, O.R.; validation, formal analysis and investigation, M.J.; resources, M.J., R.K., S.T, L.S; writing—original draft preparation, M.J.; writing—review and editing, S.T., F.H., R.K., O.R.; visualization, M.J.; supervision, S.A.

*Competing interests.* The authors declare that they have no conflict of interest.

*Acknowledgements.* This study was partially performed under a contract for the Copernicus Climate Change Service ([edge.climate.copernicus.eu](http://edge.climate.copernicus.eu)). ECMWF implements this service and the Copernicus Atmosphere Monitoring Service on behalf of the European Commission. This work is also supported by the Deutsche Forschungsgemeinschaft via Sonderforschungsbereich (CRC 1076 AquaDiva) and the German Ministry for Education and Research within the scope of the HOKLIM project ([www.ufz.de/hoklim](http://www.ufz.de/hoklim); grant number 01LS1611A). We acknowledge Sabine Sattler from Thuringian State office for the Environment and Geology (TLUG) for providing geological data. We also acknowledge people from various organizations and projects for the datasets that are used in this study, which includes ISI-MIP, JRC, NASA, GRDC, BGR and ISRIC. We acknowledge Chinese Scholarship Council (CSC) for supporting Miao Jing's work.

## References

- Barthel, R. and Banzhaf, S.: Groundwater and Surface Water Interaction at the Regional-scale – A Review with Focus on Regional Integrated Models, *Water Resources Management*, <https://doi.org/10.1007/s11269-015-1163-z>, <http://link.springer.com/10.1007/s11269-015-1163-z>, 2015.
- 5 Böhle, J. K.: Groundwater recharge and agricultural contamination, *Hydrogeology Journal*, 10, 153–179, <https://doi.org/10.1007/s10040-001-0183-3>, 2002.
- Brouyère, S., Carabin, G., and Dassargues, A.: Climate change impacts on groundwater resources: Modelled deficits in a chalky aquifer, Geer basin, Belgium, *Hydrogeology Journal*, 12, 123–134, <https://www.scopus.com/inward/record.uri?eid=2-s2.0-2642520527&partnerID=40&md5=2957a91c46907bb541a78bd39025e41c>, cited By 99, 2004.
- 10 Chen, Z., Hartmann, A., Wagener, T., and Goldscheider, N.: Dynamics of water fluxes and storages in an Alpine karst catchment under current and potential future climate conditions, *Hydrology and Earth System Sciences*, 22, 3807–3823, <https://doi.org/10.5194/hess-22-3807-2018>, <https://www.hydrol-earth-syst-sci.net/22/3807/2018/>, 2018.
- Collins, M., Knutti, R., Arblaster, J., Dufresne, J.-L., Fichefet, T., Friedlingstein, P., Gao, X., Gutowski, W. J., Johns, T., Krinner, G., Shongwe, M., Tebaldi, C., Weaver, A. J., and Wehner, M.: Long-term Climate Change: Projections, Commitments and Irreversibility, *Climate Change 2013: The Physical Science Basis. Contribution of Working Group I to the Fifth Assessment Report of the Intergovernmental Panel on Climate Change*, pp. 1029–1136, <https://doi.org/10.1017/CBO9781107415324.024>, 2013.
- 15 Cornaton, F. J.: Transient water age distributions in environmental flow systems: The time-marching Laplace transform solution technique, *Water Resources Research*, 48, 1–17, <https://doi.org/10.1029/2011WR010606>, 2012.
- Crosbie, R. S., Scanlon, B. R., Mpelasoka, F. S., Reedy, R. C., Gates, J. B., and Zhang, L.: Potential climate change effects on groundwater recharge in the High Plains Aquifer, USA, *Water Resources Research*, 49, 3936–3951, <https://doi.org/10.1002/wrcr.20292>, 2013.
- 20 Döll, P., Hoffmann-Dobrev, H., Portmann, F. T., Siebert, S., Eicker, A., Rodell, M., Strassberg, G., and Scanlon, B. R.: Impact of water withdrawals from groundwater and surface water on continental water storage variations, *Journal of Geodynamics*, 59-60, 143–156, <https://doi.org/10.1016/j.jog.2011.05.001>, <http://dx.doi.org/10.1016/j.jog.2011.05.001>, 2012.
- Engdahl, N. B.: Transient effects on confined groundwater age distributions: Considering the necessity of time-dependent simulations, *Water Resources Research*, 53, 7332–7348, <https://doi.org/10.1002/2016WR019916>, 2017.
- 25 Engdahl, N. B. and Maxwell, R. M.: Quantifying changes in age distributions and the hydrologic balance of a high-mountain watershed from climate induced variations in recharge, *Journal of Hydrology*, 522, 152–162, <https://doi.org/10.1016/j.jhydrol.2014.12.032>, <http://dx.doi.org/10.1016/j.jhydrol.2014.12.032>, 2015.
- Fischer, T., Naumov, D., Sattler, S., Kolditz, O., and Walther, M.: GO2OGS 1.0: A versatile workflow to integrate complex geological information with fault data into numerical simulation models, *Geoscientific Model Development*, 8, 3681–3694, <https://doi.org/10.5194/gmd-8-3681-2015>, 2015.
- 30 Goderniaux, P., Brouyère, S., Fowler, H. J., Blenkinsop, S., Therrien, R., Orban, P., and Dassargues, A.: Large scale surface-subsurface hydrological model to assess climate change impacts on groundwater reserves, *Journal of Hydrology*, 373, 122–138, <https://doi.org/10.1016/j.jhydrol.2009.04.017>, <http://dx.doi.org/10.1016/j.jhydrol.2009.04.017>, 2009.
- 35 Goderniaux, P., Brouyère, S., Wildemeersch, S., Therrien, R., and Dassargues, A.: Uncertainty of climate change impact on groundwater reserves - Application to a chalk aquifer, *Journal of Hydrology*, 528, 108–121, <https://doi.org/10.1016/j.jhydrol.2015.06.018>, <http://dx.doi.org/10.1016/j.jhydrol.2015.06.018>, 2015.

- Hattermann, F. F., Krysanova, V., Gosling, S. N., Dankers, R., Daggupati, P., Donnelly, C., Flörke, M., Huang, S., Motovilov, Y., Buda, S., Yang, T., Müller, C., Leng, G., Tang, Q., Portmann, F. T., Hagemann, S., Gerten, D., Wada, Y., Masaki, Y., Alemayehu, T., Satoh, Y., and Samaniego, L.: Cross-scale intercomparison of climate change impacts simulated by regional and global hydrological models in eleven large river basins, *Climatic Change*, 141, 561–576, <https://doi.org/10.1007/s10584-016-1829-4>, 2017.
- 5 Havril, T., Tóth, Á., Molson, J. W., Galsa, A., and Mádl-Szonyi, J.: Impacts of predicted climate change on groundwater flow systems: Can wetlands disappear due to recharge reduction?, *Journal of Hydrology*, <https://doi.org/10.1016/j.jhydrol.2017.09.020>, 2017.
- Haygarth, P. M., Jarvie, H. P., Powers, S. M., Sharpley, A. N., Elser, J. J., Shen, J., Peterson, H. M., Chan, N.-I., Howden, N. J. K., Burt, T., Worrall, F., Zhang, F., and Liu, X.: Sustainable Phosphorus Management and the Need for a Long-Term Perspective: The Legacy Hypothesis, *Environmental Science & Technology*, 48, 8417–8419, <https://doi.org/10.1021/es502852s>, <https://doi.org/10.1021/es502852s>, pMID: 25001016, 2014.
- 10 Haylock, M. R., Hofstra, N., Klein Tank, A. M. G., Klok, E. J., Jones, P. D., and New, M.: A European daily high-resolution gridded data set of surface temperature and precipitation for 1950–2006, *Journal of Geophysical Research: Atmospheres*, 113, <https://doi.org/10.1029/2008JD010201>, <https://agupubs.onlinelibrary.wiley.com/doi/abs/10.1029/2008JD010201>, 2008.
- Hempel, S., Frieler, K., Warszawski, L., Schewe, J., and Piontek, F.: A trend-preserving bias correction – the ISI-MIP approach, *Earth System Dynamics*, 4, 219–236, <https://doi.org/10.5194/esd-4-219-2013>, <https://www.earth-syst-dynam.net/4/219/2013/>, 2013.
- 15 Howden, N. J. K., Burt, T. P., Worrall, F., Whelan, M. J., and Bierzoza, M.: Nitrate concentrations and fluxes in the River Thames over 140 years (1868–2008): are increases irreversible?, *Hydrological Processes*, 24, 2657–2662, <https://doi.org/10.1002/hyp.7835>, <http://dx.doi.org/10.1002/hyp.7835>, 2010.
- Hunt, R. J., Walker, J. F., Selbig, W. R., Westenbroek, S. M., and Regan, R. S.: Simulation of Climate - Change effects on streamflow, Lake water budgets, and stream temperature using GSFLOW and SNTMP, Trout Lake Watershed, Wisconsin, USGS Scientific Investigations Report., pp. 2013–5159, 2013.
- 20 Huntington, J. L. and Niswonger, R. G.: Role of surface-water and groundwater interactions on projected summertime streamflow in snow dominated regions: An integrated modeling approach, *Water Resources Research*, 48, 1–20, <https://doi.org/10.1029/2012WR012319>, 2012.
- 25 Jackson, C. R., Meister, R., and Prudhomme, C.: Modelling the effects of climate change and its uncertainty on UK Chalk groundwater resources from an ensemble of global climate model projections, *Journal of Hydrology*, 399, 12–28, <https://doi.org/10.1016/j.jhydrol.2010.12.028>, <http://dx.doi.org/10.1016/j.jhydrol.2010.12.028>, 2011.
- James, R., Washington, R., Schleussner, C.-F., Rogelj, J., and Conway, D.: Characterizing half-a-degree difference: a review of methods for identifying regional climate responses to global warming targets, *Wiley Interdisciplinary Reviews: Climate Change*, 8, e457, <https://doi.org/10.1002/wcc.457>, <https://onlinelibrary.wiley.com/doi/abs/10.1002/wcc.457>, 2017.
- 30 Jing, M., Heße, F., Kumar, R., Kolditz, O., and Attinger, S.: Influence of input and parameter uncertainty on the prediction of catchment-scale groundwater travel time distributions, *Hydrology and Earth System Sciences Discussions*, 2018, 1–28, <https://doi.org/10.5194/hess-2018-383>, <https://www.hydrol-earth-syst-sci-discuss.net/hess-2018-383/>, 2018a.
- Jing, M., Heße, F., Kumar, R., Wang, W., Fischer, T., Walther, M., Zink, M., Zech, A., Samaniego, L., Kolditz, O., and Attinger, S.: Improved regional-scale groundwater representation by the coupling of the mesoscale Hydrologic Model (mHM v5.7) to the groundwater model OpenGeoSys (OGS), *Geoscientific Model Development*, 11, 1989–2007, <https://doi.org/10.5194/gmd-11-1989-2018>, <https://www.geosci-model-dev.net/11/1989/2018/>, 2018b.

- Jochen, L., R. D., and Röbling, H.-G.: Lithostratigraphie des Buntsandstein in Deutschland, Schriftenreihe der Deutschen Gesellschaft für Geowissenschaften, 69, 69–149, <https://doi.org/10.1127/sdgg/69/2014/69>, <http://dx.doi.org/10.1127/sdgg/69/2014/69>, 2014.
- Jyrkama, M. I. and Sykes, J. F.: The impact of climate change on spatially varying groundwater recharge in the grand river watershed (Ontario), *Journal of Hydrology*, 338, 237–250, <https://doi.org/10.1016/j.jhydrol.2007.02.036>, 2007.
- 5 Kaandorp, V. P., Louw, P. G. B., Velde, Y., and Broers, H. P.: Transient Groundwater Travel Time Distributions and Age-Ranked Storage-Discharge Relationships of Three Lowland Catchments, *Water Resources Research*, 54, 4519–4536, <https://doi.org/10.1029/2017WR022461>, <https://agupubs.onlinelibrary.wiley.com/doi/abs/10.1029/2017WR022461>, 2018.
- Kang, S. and Eltahir, E. A. B.: North China Plain threatened by deadly heatwaves due to climate change and irrigation, *Nature Communications*, 9, 2894, <https://doi.org/10.1038/s41467-018-05252-y>, <http://www.nature.com/articles/s41467-018-05252-y>, 2018.
- 10 Kohlhepp, B., Lehmann, R., Seeber, P., Küsel, K., Trumbore, S. E., and Totsche, K. U.: Aquifer configuration and geostructural links control the groundwater quality in thin-bedded carbonate–siliciclastic alternations of the Hainich CZE, central Germany, *Hydrology and Earth System Sciences*, 21, 6091–6116, <https://doi.org/10.5194/hess-21-6091-2017>, <https://www.hydrol-earth-syst-sci.net/21/6091/2017/>, 2017.
- Kollet, S. J. and Maxwell, R. M.: Capturing the influence of groundwater dynamics on land surface processes using an integrated, distributed watershed model, *Water Resources Research*, 44, 1–18, <https://doi.org/10.1029/2007WR006004>, 2008.
- 15 Kottek, M., Grieser, J., Beck, C., Rudolf, B., and Rubel, F.: World map of the Köppen-Geiger climate classification updated, *Meteorologische Zeitschrift*, 15, 259–263, <https://doi.org/10.1127/0941-2948/2006/0130>, 2006.
- Kumar, R., Samaniego, L., and Attinger, S.: Implications of distributed hydrologic model parameterization on water fluxes at multiple scales and locations, *Water Resources Research*, 49, 360–379, <https://doi.org/10.1029/2012WR012195>, <https://agupubs.onlinelibrary.wiley.com/doi/abs/10.1029/2012WR012195>, 2013.
- 20 Küsel, K., Totsche, K. U., Trumbore, S. E., Lehmann, R., Steinhäuser, C., and Herrmann, M.: How Deep Can Surface Signals Be Traced in the Critical Zone? Merging Biodiversity with Biogeochemistry Research in a Central German Muschelkalk Landscape, *Frontiers in Earth Science*, 4, 1–18, <https://doi.org/10.3389/feart.2016.00032>, <http://journal.frontiersin.org/Article/10.3389/feart.2016.00032/abstract>, 2016.
- Leung, L. R., Huang, M., Qian, Y., and Liang, X.: Climate-soil-vegetation control on groundwater table dynamics and its feedbacks in a climate model, *Climate Dynamics*, 36, 57–81, <https://doi.org/10.1007/s00382-010-0746-x>, 2011.
- 25 Liang, X., Xie, Z., and Huang, M.: A new parameterization for surface and groundwater interactions and its impact on water budgets with the variable infiltration capacity (VIC) land surface model, *Journal of Geophysical Research*, 108, 8613–8629, <https://doi.org/10.1029/2002JD003090>, <http://www.agu.org/pubs/crossref/2003/2002JD003090.shtml>, 2003.
- Marx, A., Kumar, R., Thober, S., Rakovec, O., Wanders, N., Zink, M., Wood, E. F., Pan, M., Sheffield, J., and Samaniego, L.: Climate change alters low flows in Europe under global warming of 1.5, 2, and 3 °C, *Hydrology and Earth System Sciences*, 22, 1017–1032, <https://doi.org/10.5194/hess-22-1017-2018>, <https://www.hydrol-earth-syst-sci.net/22/1017/2018/>, 2018.
- Maxwell, R. M. and Kollet, S. J.: Interdependence of groundwater dynamics and land-energy feedbacks under climate change, *Nature Geoscience*, 1, 665–669, <https://doi.org/10.1038/ngeo315>, <http://www.nature.com/doi/10.1038/ngeo315>, 2008.
- McCann, T.: *The Geology of Central Europe Volume 2: Mesozoic and Cenozoic*, Geological Society of London, <https://doi.org/10.1144/CEV2P>, <https://doi.org/10.1144/CEV2P>, 2008.
- 35 Meehl, G. A., Stocker, T. F., Collins, W. D., Friedlingstein, P., Gaye, T., Gregory, J. M., Kitoh, A., Knutti, R., Murphy, J. M., Noda, A., et al.: Global climate projections, 2007.

- Moutahir, H., Bellot, P., Monjo, R., Bellot, J., Garcia, M., and Touhami, I.: Likely effects of climate change on groundwater availability in a Mediterranean region of Southeastern Spain, *Hydrological Processes*, 31, 161–176, <https://doi.org/10.1002/hyp.10988>, <https://onlinelibrary.wiley.com/doi/abs/10.1002/hyp.10988>, 2016.
- 5 Park, C. H., Beyer, C., Bauer, S., and Kolditz, O.: Using global node-based velocity in random walk particle tracking in variably saturated porous media: Application to contaminant leaching from road constructions, *Environmental Geology*, 55, 1755–1766, <https://doi.org/10.1007/s00254-007-1126-7>, 2008a.
- Park, C.-H., Beyer, C., Bauer, S., and Kolditz, O.: A study of preferential flow in heterogeneous media using random walk particle tracking, *Geosciences Journal*, 12, 285–297, <https://doi.org/10.1007/s12303-008-0029-2>, <https://doi.org/10.1007/s12303-008-0029-2>, 2008b.
- Pulido-Velazquez, M., Peña-Haro, S., García-Prats, A., Mocholi-Almudever, A. F., Henriquez-Dole, L., Macian-Sorribes, H., and Lopez-Nicolas, A.: Integrated assessment of the impact of climate and land use changes on groundwater quantity and quality in the Mancha Oriental system (Spain), *Hydrology and Earth System Sciences*, 19, 1677–1693, <https://doi.org/10.5194/hess-19-1677-2015>, 2015.
- 10 Renée Brooks, J., Barnard, H. R., Coulombe, R., and McDonnell, J. J.: Ecohydrologic separation of water between trees and streams in a Mediterranean climate, *Nature Geoscience*, 3, 100–104, <https://doi.org/10.1038/ngeo722>, <http://www.nature.com/doi/10.1038/ngeo722>, 2010.
- 15 Samaniego, L., Kumar, R., and Attinger, S.: Multiscale parameter regionalization of a grid-based hydrologic model at the mesoscale, *Water Resources Research*, 46, n/a–n/a, <https://doi.org/10.1029/2008WR007327>, <http://doi.wiley.com/10.1029/2008WR007327>, 2010.
- Samaniego, L., Thober, S., Kumar, R., Wanders, N., Rakovec, O., Pan, M., Zink, M., Sheffield, J., Wood, E., and Marx, A.: Anthropogenic warming exacerbates European soil moisture droughts, *Nature Climate Change*, 8, 421, 2018.
- Sandström, K.: Modeling the Effects of Rainfall Variability on Groundwater Recharge in Semi-Arid Tanzania, *Hydrology Research*, 26, 313, <https://doi.org/10.2166/nh.1995.0018>, <http://dx.doi.org/10.2166/nh.1995.0018>, 1995.
- 20 Schewe, J., Heinke, J., Gerten, D., Haddeland, I., Arnell, N. W., Clark, D. B., Dankers, R., Eisner, S., Fekete, B. M., Colón-González, F. J., Gosling, S. N., Kim, H., Liu, X., Masaki, Y., Portmann, F. T., Satoh, Y., Stacke, T., Tang, Q., Wada, Y., Wisser, D., Albrecht, T., Frieler, K., Piontek, F., Warszawski, L., and Kabat, P.: Multimodel assessment of water scarcity under climate change, *Proceedings of the National Academy of Sciences*, 111, 3245–3250, <https://doi.org/10.1073/pnas.1222460110>, <http://www.pnas.org/lookup/doi/10.1073/pnas.1222460110>, 2014.
- 25 Scibek, J., Allen, D. M., Cannon, A. J., and Whitfield, P. H.: Groundwater-surface water interaction under scenarios of climate change using a high-resolution transient groundwater model, *Journal of Hydrology*, 333, 165–181, <https://doi.org/10.1016/j.jhydrol.2006.08.005>, 2007.
- Seidel, H. G., ed.: *Geologie von Thüringen*, Schweizerbart Science Publishers, Stuttgart, Germany, [http://www.schweizerbart.de/publications/detail/isbn/9783510652051/Geologie\\_von\\_Thuringen\\_herausg\\_v\\_G\\_Se](http://www.schweizerbart.de/publications/detail/isbn/9783510652051/Geologie_von_Thuringen_herausg_v_G_Se), 2003.
- 30 Smerdon, B. D., Mendoza, C. A., and Devito, K. J.: Simulations of fully coupled lake-groundwater exchange in a subhumid climate with an integrated hydrologic model, *Water Resources Research*, 43, n/a–n/a, <http://onlinelibrary.wiley.com/doi/10.1029/2006WR005137/full>, 2007.
- Sridhar, V., Billah, M. M., and Hildreth, J. W.: Coupled Surface and Groundwater Hydrological Modeling in a Changing Climate, *Groundwater*, <https://doi.org/10.1111/gwat.12610>, 2017.
- 35 Stewart, M. K., Morgenstern, U., McDonnell, J. J., and Pfister, L.: The 'hidden streamflow' challenge in catchment hydrology: A call to action for stream water transit time analysis, *Hydrological Processes*, 26, 2061–2066, <https://doi.org/10.1002/hyp.9262>, 2012.



- Stisen, S., Sonnenborg, T. O., Højberg, A. L., Trolborg, L., and Refsgaard, J. C.: Evaluation of Climate Input Biases and Water Balance Issues Using a Coupled Surface–Subsurface Model, *Vadose Zone Journal*, 10, 37, <https://doi.org/10.2136/vzj2010.0001>, <https://www.soils.org/publications/vzj/abstracts/10/1/37>, 2011.
- 5 Stocker, T.: *Climate change 2013: the physical science basis: Working Group I contribution to the Fifth assessment report of the Intergovernmental Panel on Climate Change*, Cambridge University Press, 2014.
- Taylor, R. G., Scanlon, B., Döll, P., Rodell, M., van Beek, R., Wada, Y., Longuevergne, L., Leblanc, M., Famiglietti, J. S., Edmunds, M., Konikow, L., Green, T. R., Chen, J., Taniguchi, M., Bierkens, M. F. P., MacDonald, A., Fan, Y., Maxwell, R. M., Yechieli, Y., Gurdak, J. J., Allen, D. M., Shamsudduha, M., Hiscock, K., Yeh, P. J.-F., Holman, I., Treidel, H., van Beek, R., Wada, Y., Leblanc, Laurent Longuevergne, M., Famiglietti, J. S., Edmunds, M., Konikow, L., Green, T. R., Chen, J., Taniguchi, M., Bierkens, M. F. P., MacDonald, A., Fan, Y., Maxwell, R. M., Yechieli, Y., Gurdak, J. J., Allen, D. M., Shamsudduha, M., Hiscock, K., Yeh, P. J.-F., Holman, I., and Treidel, H.: Ground water and climate change, *Nature Climate Change*, 3, 1–9, <https://doi.org/10.1038/NCLIMATE1744>, <http://dx.doi.org/10.1038/nclimate1744> { $\%$ }5Cn<http://works.bepress.com/green/6/>, 2012.
- 10 Thober, S., Kumar, R., Wanders, N., Marx, A., Pan, M., Rakovec, O., Samaniego, L., Sheffield, J., Wood, E. F., and Zink, M.: Multi-model ensemble projections of European river floods and high flows at 1.5, 2, and 3 degrees global warming, *Environmental Research Letters*, 13, 014 003, <http://stacks.iop.org/1748-9326/13/i=1/a=014003>, 2018.
- 15 Tillman, F. D., Gangopadhyay, S., and Pruitt, T.: Changes in groundwater recharge under projected climate in the upper Colorado River basin, *Geophysical Research Letters*, 43, 6968–6974, <https://doi.org/10.1002/2016GL069714>, <https://agupubs.onlinelibrary.wiley.com/doi/abs/10.1002/2016GL069714>, 2016.
- Treidel, H., Martin-bordes, J. L., and Gurdak, J. J.: *Climate Change Effects on Groundwater Resources: A Global Synthesis of Findings and Recommendations*, CRC Press, 2012.
- 20 Van Meter, K. J., Basu, N. B., and Van Cappellen, P.: Two centuries of nitrogen dynamics: Legacy sources and sinks in the Mississippi and Susquehanna River Basins, *Global Biogeochemical Cycles*, 31, 2–23, <https://doi.org/10.1002/2016GB005498>, 2017.
- Van Roosmalen, L., Sonnenborg, T. O., and Jensen, K. H.: Impact of climate and land use change on the hydrology of a large-scale agricultural catchment, *Water Resources Research*, 45, 1–18, <https://doi.org/10.1029/2007WR006760>, 2009.
- 25 Wang, H., Richardson, C. J., Ho, M., and Flanagan, N.: Drained coastal peatlands: A potential nitrogen source to marine ecosystems under prolonged drought and heavy storm events—A microcosm experiment, *Science of The Total Environment*, 566–567, 621 – 626, <https://doi.org/https://doi.org/10.1016/j.scitotenv.2016.04.211>, <http://www.sciencedirect.com/science/article/pii/S0048969716309573>, 2016.
- Warszawski, L., Frieler, K., Huber, V., Piontek, F., Serdeczny, O., and Schewe, J.: The Inter-Sectoral Impact Model Intercomparison Project (ISI-MIP): Project framework, *Proceedings of the National Academy of Sciences*, 111, 3228–3232, <https://doi.org/10.1073/pnas.1312330110>, <http://www.pnas.org/content/111/9/3228>, 2014.
- 30 Wechsung, F., Kaden, S., Behrendt, H., and Klöcking, B., eds.: *Integrated Analysis of the Impacts of Global Change on Environment and Society in the Elbe Basin*, Schweizerbart Science Publishers, Stuttgart, Germany, [http://www.schweizerbart.de/publications/detail/isbn/9783510653041/Wechsung\\_Integrated\\_Analysis\\_of\\_the\\_Imp](http://www.schweizerbart.de/publications/detail/isbn/9783510653041/Wechsung_Integrated_Analysis_of_the_Imp), 2008.
- 35 Woldeamlak, S. T., Batelaan, O., and De Smedt, F.: Effects of climate change on the groundwater system in the Grote-Nete catchment, Belgium, *Hydrogeology Journal*, 15, 891–901, <https://doi.org/10.1007/s10040-006-0145-x>, <http://link.springer.com/10.1007/s10040-006-0145-x>, 2007.

- Wood, E. F., Roundy, J. K., Troy, T. J., van Beek, L. P. H., Bierkens, M. F. P., Blyth, E., de Roo, A., Döll, P., Ek, M., Famiglietti, J., Gochis, D., van de Giesen, N., Houser, P., Jaffé, P. R., Kollet, S., Lehner, B., Lettenmaier, D. P., Peters-Lidard, C., Sivapalan, M., Sheffield, J., Wade, A., and Whitehead, P.: Hyperresolution global land surface modeling: Meeting a grand challenge for monitoring Earth's terrestrial water, *Water Resources Research*, 47, <https://doi.org/10.1029/2010WR010090>, <https://agupubs.onlinelibrary.wiley.com/doi/abs/10.1029/2010WR010090>, 2011.
- 5 Zink, M., Kumar, R., Cuntz, M., and Samaniego, L.: A high-resolution dataset of water fluxes and states for Germany accounting for parametric uncertainty, *Hydrology and Earth System Sciences*, 21, 1769–1790, <https://doi.org/10.5194/hess-21-1769-2017>, <http://www.hydrol-earth-syst-sci.net/21/1769/2017/>, 2017.
